# Supplementary material for: Chemical Profile and Biological Activities of Brassica rapa and Brassica napus Ex Situ Collection from Portugal
Source: MDPI journal article supplement (doi:10.3390/foods13081164), 2024-04-11
Supplement: s1 [file s1]

# Chemical Profile and Biological Activities of *Brassica rapa* and *Brassica napus* Ex Situ Collection from Portugal

Carmo Serrano <sup>1,2,\*</sup>, M. Conceição Oliveira <sup>3</sup>, V. Rolim Lopes <sup>6</sup>, Andreia Soares <sup>1</sup>, Adriana Molina<sup>4,5</sup>, Beatriz H. Paschoalinotto<sup>4,5</sup>, Tânia C.S.P. Pires <sup>4,5</sup>, Octávio Serra<sup>6</sup> and Ana M. Barata <sup>6</sup>

- <sup>1</sup> Instituto Nacional de Investigação Agrária e Veterinária (INIAV, I.P.), Av. da República, 2780-157 Oeiras, Portugal; margarida.sapata@iniav.pt (M.S.); andrea.soaes@iniav.pt (A.S.)
  - <sup>2</sup> LEAF–Linking Landscape: Environment, Agriculture and Food–Research Center, Instituto Superior de Agronomia, Associated Laboratory TERRA, Universidade de Lisboa, Tapada da Ajuda, 1349-017 Lisboa, Portugal
  - <sup>3</sup> Centro de Química Estrutural, Institute of Molecular Sciences, Instituto Superior Técnico, Universidade de Lisboa, 1049-001 Lisboa, Portugal; conceicao.oliveira@tecnico.ulisboa.pt (M.C. Oliveira)
  - <sup>4</sup> Centro de Investigação de Montanha (CIMO), Instituto Politécnico de Bragança, Campus de Santa Apolónia, 5300-253 Bragança, Portugal; carlap@ipb.pt (C.P.); ruiabreu@ipb.pt (R.M.V.A.); lillian@ipb.pt (L.B.)
  - <sup>5</sup> Laboratório Associado para a Sustentabilidade e Tecnologia em Regiões de Montanha (SusTEC), Instituto Politécnico de Bragança, Campus de Santa Apolónia, 5300-253 Bragança, Portugal
  - <sup>6</sup> Banco Português de Germoplasma Vegetal (BPGV), INIAV I.P., Qta S. José, S. Pedro Merelim, 4700-859 Braga, Portugal
- \* Correspondence: carmo.serrano@iniav.pt

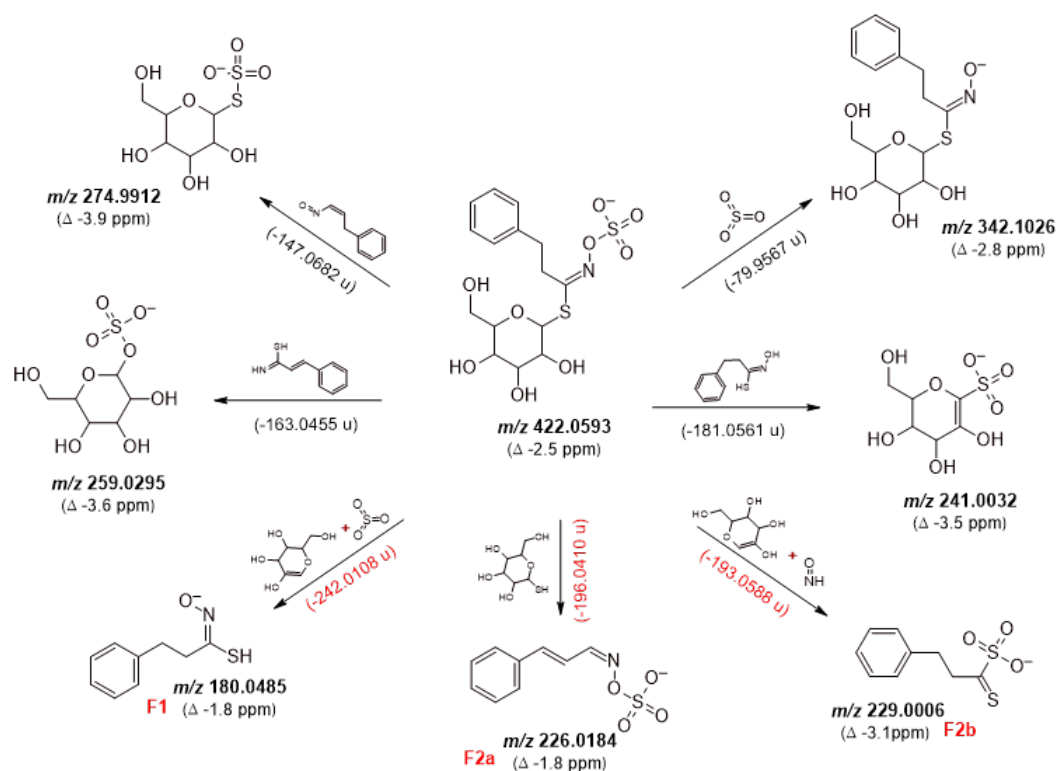

**Scheme S1** – Proposed fragmentation mechanism for precursor ion  $m/z$  422.0593 attributed to the deprotonated molecule of Gluconasturtiin
